# Supplementary material for: Comprehensive Atlas of Alternative Splicing Reveals NSRP1 Promoting Adipogenesis through CCDC18
Source: Preprints.org preprint supplement (doi:10.20944/preprints202401.1566.v1), 2024-01-23
Supplement: Supplementary file 1 [file supplementary]

## Sheet: Table S2
Table S2. The detailed information of the transcriptome data
LibraryLayout	Run	SRA_Sample	Organism_part	Tissue	MBases	MBytes	Platform	age	sex	breed	Type
PAIRED	SRR1107684	SRS529088	Backfat	Adipose	4627	3190	Illumina HiSeq 2000	218 days	female	songliao black pigs	Eastern
PAIRED	SRR1107703	SRS529091	Backfat	Adipose	4627	3166	Illumina HiSeq 2000	218 days	female	songliao black pigs	Eastern
PAIRED	SRR1107709	SRS529092	Backfat	Adipose	4403	2934	Illumina HiSeq 2000	216 days	female	songliao black pigs	Eastern
PAIRED	SRR1107711	SRS529093	Backfat	Adipose	4584	3152	Illumina HiSeq 2000	216 days	female	songliao black pigs	Eastern
PAIRED	SRR1107716	SRS529094	Backfat	Adipose	4218	2838	Illumina HiSeq 2000	211 days	female	songliao black pigs	Eastern
PAIRED	SRR1107718	SRS529095	Backfat	Adipose	4516	3015	Illumina HiSeq 2000	218 days	female	songliao black pigs	Eastern
PAIRED	SRR2564766	SRS1100819	Adipose	Adipose	7630	4722	Illumina HiSeq 2000	postnatal 240 days		Guizhou mini-pigs	Eastern
PAIRED	SRR3160045	SRS1283309	Subcutaneous adipose	Adipose	5143	3567	Illumina HiSeq 2500	60 days old		Bamei	Eastern
PAIRED	SRR3160055	SRS1283299	Subcutaneous adipose	Adipose	6183	4293	Illumina HiSeq 2500	60 days old		Jinhua	Eastern
PAIRED	SRR3160065	SRS1283289	Subcutaneous adipose	Adipose	5510	3821	Illumina HiSeq 2500	60 days old		Meishan	Eastern
PAIRED	SRR776500	SRS401906	Fat	Adipose	3988	2666	Illumina HiSeq 2000			Korean native pig	Eastern
PAIRED	SRR1979629	SRS912959	Backfat	Adipose	24015	15547	Illumina HiSeq 2000	247 days	female	Italian Large White	Western
PAIRED	SRR1979630	SRS912958	Backfat	Adipose	17354	11652	Illumina HiSeq 2000	237 days	male	Italian Large White	Western
PAIRED	SRR1979631	SRS912957	Backfat	Adipose	15928	10776	Illumina HiSeq 2000	233 days	male	Italian Large White	Western
PAIRED	SRR1979632	SRS912956	Backfat	Adipose	16338	10955	Illumina HiSeq 2000	235 days	female	Italian Large White	Western
PAIRED	SRR1979633	SRS912955	Backfat	Adipose	18494	12508	Illumina HiSeq 2000	243 days	male	Italian Large White	Western
PAIRED	SRR1979634	SRS912954	Backfat	Adipose	21789	14970	Illumina HiSeq 2000	239 days	female	Italian Large White	Western
PAIRED	SRR1979635	SRS912953	Backfat	Adipose	18495	12702	Illumina HiSeq 2000	243 days	male	Italian Large White	Western
PAIRED	SRR1979636	SRS912952	Backfat	Adipose	19374	13250	Illumina HiSeq 2000	243 days	female	Italian Large White	Western
PAIRED	SRR1979637	SRS912951	Backfat	Adipose	18292	12544	Illumina HiSeq 2000	249 days	male	Italian Large White	Western
PAIRED	SRR1979638	SRS912950	Backfat	Adipose	20915	14350	Illumina HiSeq 2000	237 days	female	Italian Large White	Western
PAIRED	SRR1979639	SRS912949	Backfat	Adipose	18001	12364	Illumina HiSeq 2000	250 days	female	Italian Large White	Western
PAIRED	SRR1979640	SRS912948	Backfat	Adipose	19388	12540	Illumina HiSeq 2000	241 days	male	Italian Large White	Western
PAIRED	SRR1979641	SRS912947	Backfat	Adipose	18997	12971	Illumina HiSeq 2000	249 days	female	Italian Large White	Western
PAIRED	SRR1979642	SRS912946	Backfat	Adipose	20117	13743	Illumina HiSeq 2000	249 days	female	Italian Large White	Western
PAIRED	SRR1979643	SRS912945	Backfat	Adipose	19992	13809	Illumina HiSeq 2000	241 days	male	Italian Large White	Western
PAIRED	SRR1979644	SRS912944	Backfat	Adipose	15592	10723	Illumina HiSeq 2000	244 days	female	Italian Large White	Western
PAIRED	SRR1979645	SRS912943	Backfat	Adipose	20931	14529	Illumina HiSeq 2000	241 days	male	Italian Large White	Western
PAIRED	SRR1979646	SRS912942	Backfat	Adipose	18778	13040	Illumina HiSeq 2000	235 days	male	Italian Large White	Western
PAIRED	SRR1979647	SRS912941	Backfat	Adipose	17152	11967	Illumina HiSeq 2000	250 days	female	Italian Large White	Western
PAIRED	SRR1979648	SRS912940	Backfat	Adipose	17008	11847	Illumina HiSeq 2000	241 days	male	Italian Large White	Western
PAIRED	SRR3159995	SRS1283267	Subcutaneous adipose	Adipose	5492	3633	Illumina HiSeq 2500	60 days old		Berkshire	Western
PAIRED	SRR3160005	SRS1283349	Subcutaneous adipose	Adipose	5276	3609	Illumina HiSeq 2500	60 days old		Hampshire	Western
PAIRED	SRR3160015	SRS1283338	Subcutaneous adipose	Adipose	6382	4018	Illumina HiSeq 2500	60 days old		Landrace	Western
PAIRED	SRR3160025	SRS1283328	Subcutaneous adipose	Adipose	5467	3515	Illumina HiSeq 2500	60 days old		Large White	Western
PAIRED	SRR3160035	SRS1283319	Subcutaneous adipose	Adipose	5619	3879	Illumina HiSeq 2500	60 days old		Piétrain	Western
PAIRED	SRR776497	SRS401903	Fat	Adipose	3882	2603	Illumina HiSeq 2000			Berkshire	Western
PAIRED	SRR2288563	SRS1055068	PBMC	Blood	4559	3418	Illumina HiSeq 2000	2 months	male	Chinese experimental miniature pigs	Eastern
PAIRED	SRR2288565	SRS1058353	PBMC	Blood	4693	3512	Illumina HiSeq 2000	2 months	male	Chinese experimental miniature pigs	Eastern
PAIRED	SRR2288566	SRS1058355	PBMC	Blood	5027	3758	Illumina HiSeq 2000	2 months	male	Chinese experimental miniature pigs	Eastern
PAIRED	SRR2288571	SRS1058358	PBMC	Blood	3560	2671	Illumina HiSeq 2000	2 months	male	Chinese experimental miniature pigs	Eastern
PAIRED	SRR2288574	SRS1058360	PBMC	Blood	4707	3516	Illumina HiSeq 2000	2 months	male	Chinese experimental miniature pigs	Eastern
PAIRED	SRR2288579	SRS1058361	PBMC	Blood	4866	3639	Illumina HiSeq 2000	2 months	male	Chinese experimental miniature pigs	Eastern
PAIRED	SRR2288782	SRS1058371	PBMC	Blood	3598	2686	Illumina HiSeq 2000	2 months	male	Chinese experimental miniature pigs	Eastern
PAIRED	SRR2288783	SRS1058373	PBMC	Blood	3422	2550	Illumina HiSeq 2000	2 months	male	Chinese experimental miniature pigs	Eastern
PAIRED	SRR2288784	SRS1058374	PBMC	Blood	4205	3140	Illumina HiSeq 2000	2 months	male	Chinese experimental miniature pigs	Eastern
PAIRED	SRR2292026	SRS1058359	PBMC	Blood	4684	3494	Illumina HiSeq 2000	2 months	male	Chinese experimental miniature pigs	Eastern
PAIRED	ERR1199492	ERS1028019	Whole blood	Blood	1366	578	Illumina HiSeq 2000	35-42 days	female	Yorkshire	Western
PAIRED	ERR1199493	ERS1028020	Whole blood	Blood	5110	2242	Illumina HiSeq 2000	35-42 days	female	Yorkshire	Western
PAIRED	ERR1199494	ERS1028021	Whole blood	Blood	3882	1704	Illumina HiSeq 2000	35-42 days	female	Yorkshire	Western
PAIRED	ERR1199495	ERS1028022	Whole blood	Blood	4345	1907	Illumina HiSeq 2000	35-42 days	female	Yorkshire	Western
PAIRED	ERR1199496	ERS1028023	Whole blood	Blood	3617	1588	Illumina HiSeq 2000	35-42 days	female	Yorkshire	Western
PAIRED	ERR1199497	ERS1028024	Whole blood	Blood	1523	665	Illumina HiSeq 2000	35-42 days	female	Yorkshire	Western
PAIRED	ERR1199498	ERS1028025	Whole blood	Blood	4492	1976	Illumina HiSeq 2000	35-42 days	female	Yorkshire	Western
PAIRED	ERR1199499	ERS1028026	Whole blood	Blood	2614	1126	Illumina HiSeq 2000	35-42 days	female	Yorkshire	Western
PAIRED	ERR1199500	ERS1028027	Whole blood	Blood	1767	771	Illumina HiSeq 2000	35-42 days	female	Yorkshire	Western
PAIRED	ERR1199501	ERS1028028	Whole blood	Blood	3683	1560	Illumina HiSeq 2000	35-42 days	female	Yorkshire	Western
PAIRED	ERR1199502	ERS1028029	Whole blood	Blood	4556	2000	Illumina HiSeq 2000	35-42 days	female	Yorkshire	Western
PAIRED	ERR1199503	ERS1028030	Whole blood	Blood	4059	1789	Illumina HiSeq 2000	35-42 days	female	Yorkshire	Western
PAIRED	ERR1199504	ERS1028031	Whole blood	Blood	3931	1717	Illumina HiSeq 2000	35-42 days	female	Yorkshire	Western
PAIRED	ERR1199505	ERS1028032	Whole blood	Blood	3302	1438	Illumina HiSeq 2000	35-42 days	female	Yorkshire	Western
PAIRED	ERR1199506	ERS1028033	Whole blood	Blood	3303	1461	Illumina HiSeq 2000	35-42 days	female	Yorkshire	Western
PAIRED	ERR1199507	ERS1028034	Whole blood	Blood	5769	2515	Illumina HiSeq 2000	35-42 days	female	Yorkshire	Western
PAIRED	ERR1199508	ERS1028035	Whole blood	Blood	9036	3821	Illumina HiSeq 2000	35-42 days	female	Yorkshire	Western
PAIRED	ERR1199509	ERS1028036	Whole blood	Blood	3747	1600	Illumina HiSeq 2000	35-42 days	female	Yorkshire	Western
PAIRED	ERR1199510	ERS1028037	Whole blood	Blood	3438	1506	Illumina HiSeq 2000	35-42 days	female	Yorkshire	Western
PAIRED	ERR1199511	ERS1028038	Whole blood	Blood	4129	1817	Illumina HiSeq 2000	35-42 days	female	Yorkshire	Western
PAIRED	ERR1199512	ERS1028039	Whole blood	Blood	2379	1040	Illumina HiSeq 2000	35-42 days	female	Yorkshire	Western
PAIRED	ERR1199513	ERS1028040	Whole blood	Blood	3250	1387	Illumina HiSeq 2000	35-42 days	female	Yorkshire	Western
PAIRED	ERR1199514	ERS1028041	Whole blood	Blood	3908	1719	Illumina HiSeq 2000	35-42 days	female	Yorkshire	Western
PAIRED	ERR1199515	ERS1028042	Whole blood	Blood	3774	1664	Illumina HiSeq 2000	35-42 days	female	Yorkshire	Western
PAIRED	ERR1199516	ERS1028043	Whole blood	Blood	3957	1739	Illumina HiSeq 2000	35-42 days	female	Yorkshire	Western
PAIRED	ERR1199517	ERS1028044	Whole blood	Blood	4341	1907	Illumina HiSeq 2000	35-42 days	female	Yorkshire	Western
PAIRED	ERR1199518	ERS1028045	Whole blood	Blood	6900	3017	Illumina HiSeq 2000	35-42 days	female	Yorkshire	Western
PAIRED	ERR1199519	ERS1028046	Whole blood	Blood	2948	1257	Illumina HiSeq 2000	35-42 days	female	Yorkshire	Western
PAIRED	ERR1199520	ERS1028047	Whole blood	Blood	3550	1565	Illumina HiSeq 2000	35-42 days	female	Yorkshire	Western
PAIRED	ERR1199521	ERS1028048	Whole blood	Blood	4873	2068	Illumina HiSeq 2000	35-42 days	female	Yorkshire	Western
PAIRED	ERR1199522	ERS1028049	Whole blood	Blood	3083	1363	Illumina HiSeq 2000	35-42 days	female	Yorkshire	Western
PAIRED	SRR2634171	SRS1111962	Blood	Blood	5546	2601	Illumina HiSeq 2000	five weeks	pooled male and female	Dapulian	Western
PAIRED	SRR2640162	SRS1111962	Blood	Blood	5457	2681	Illumina HiSeq 2000	five weeks	pooled male and female	Dapulian	Western
PAIRED	SRR2640267	SRS1111962	Blood	Blood	5861	2749	Illumina HiSeq 2000	five weeks	pooled male and female	Dapulian	Western
PAIRED	SRR2640268	SRS1113283	Blood	Blood	5878	2759	Illumina HiSeq 2000	five weeks	pooled male and female	Dapulian	Western
PAIRED	SRR2640269	SRS1113283	Blood	Blood	5523	2594	Illumina HiSeq 2000	five weeks	pooled male and female	Dapulian	Western
PAIRED	SRR2640270	SRS1113283	Blood	Blood	5798	2722	Illumina HiSeq 2000	five weeks	pooled male and female	Dapulian	Western
PAIRED	SRR2640596	SRS1113310	Blood	Blood	5484	2579	Illumina HiSeq 2000	five weeks	pooled male and female	Landrace	Western
PAIRED	SRR2640600	SRS1113310	Blood	Blood	5477	2574	Illumina HiSeq 2000	five weeks	pooled male and female	Landrace	Western
PAIRED	SRR2640601	SRS1113310	Blood	Blood	5612	2640	Illumina HiSeq 2000	five weeks	pooled male and female	Landrace	Western
PAIRED	SRR2642730	SRS1113480	Blood	Blood	5503	2603	Illumina HiSeq 2000	five weeks	pooled male and female	Landrace	Western
PAIRED	SRR2642731	SRS1113480	Blood	Blood	5437	2568	Illumina HiSeq 2000	five weeks	pooled male and female	Landrace	Western
PAIRED	SRR2642732	SRS1113480	Blood	Blood	5464	2569	Illumina HiSeq 2000	five weeks	pooled male and female	Landrace	Western
PAIRED	SRR7475979	SRS3505425	PBMC	Blood	8672	3768	HiSeq X Ten	6 months		Yorkshire	Western
PAIRED	SRR7475980	SRS3505427	PBMC	Blood	9171	3991	HiSeq X Ten	6 months		Yorkshire	Western
PAIRED	SRR7475981	SRS3505426	PBMC	Blood	7951	3463	HiSeq X Ten	6 months		Yorkshire	Western
PAIRED	SRR7475982	SRS3505429	PBMC	Blood	9381	4090	HiSeq X Ten	6 months		Yorkshire	Western
PAIRED	SRR7475983	SRS3505428	PBMC	Blood	8826	3810	HiSeq X Ten	6 months		Yorkshire	Western
PAIRED	SRR7475984	SRS3505430	PBMC	Blood	7859	3424	HiSeq X Ten	6 months		Yorkshire	Western
PAIRED	SRR653843	SRS388205	Heart	Heart	9987	7373	Illumina HiSeq 2000			Tibetan	Eastern
PAIRED	SRR2564757	SRS1100812	Heart	Heart	7354	4146	Illumina HiSeq 2000	postnatal 240 days		Guizhou mini-pigs	Eastern
PAIRED	SRR3160068	SRS1283286	Heart	Heart	3985	2836	Illumina HiSeq 2500	60 days old		Rongchang	Eastern
PAIRED	SRR3160058	SRS1283296	Heart	Heart	5241	3448	Illumina HiSeq 2500	60 days old		Meishan	Eastern
PAIRED	SRR3160048	SRS1283306	Heart	Heart	4451	2985	Illumina HiSeq 2500	60 days old		Jinhua	Eastern
PAIRED	SRR3160038	SRS1283316	Heart	Heart	5157	3458	Illumina HiSeq 2500	60 days old		Bamei	Eastern
PAIRED	SRR5133954	SRS1882060	Heart	Heart	5367	3577	Illumina HiSeq 2000	6 months	male	Tibetan	Eastern
PAIRED	SRR5133955	SRS1882061	Heart	Heart	6575	4456	Illumina HiSeq 2000	6 months	male	Tibetan	Eastern
PAIRED	SRR5133956	SRS1882062	Heart	Heart	8089	5462	Illumina HiSeq 2000	6 months	male	Tibetan	Eastern
PAIRED	SRR3159988	SRS1283274	Heart	Heart	5098	3358	Illumina HiSeq 2500	60 days old		Berkshire	Western
PAIRED	SRR3160028	SRS1283326	Heart	Heart	3465	2378	Illumina HiSeq 2500	60 days old		Piétrain	Western
PAIRED	SRR3160018	SRS1283334	Heart	Heart	4128	2933	Illumina HiSeq 2500	60 days old		Large White	Western
PAIRED	SRR3160008	SRS1283346	Heart	Heart	5172	3687	Illumina HiSeq 2500	60 days old		Landrace	Western
PAIRED	SRR3159998	SRS1283355	Heart	Heart	4416	3032	Illumina HiSeq 2500	60 days old		Hampshire	Western
PAIRED	SRR5133957	SRS1882063	Heart	Heart	6658	4484	Illumina HiSeq 2000	6 months	male	Yorkshire	Western
PAIRED	SRR5133958	SRS1882064	Heart	Heart	6887	4720	Illumina HiSeq 2000	6 months	male	Yorkshire	Western
PAIRED	SRR5133959	SRS1882065	Heart	Heart	6303	4234	Illumina HiSeq 2000	6 months	male	Yorkshire	Western
PAIRED	SRR5133960	SRS1882066	Heart	Heart	7473	4940	Illumina HiSeq 2000	6 months	male	Yorkshire	Western
PAIRED	SRR3160071	SRS1283283	Kidney	Kidney	4482	3168	Illumina HiSeq 2500	60 days old		Rongchang	Eastern
PAIRED	SRR2564761	SRS1100809	Kidney	Kidney	7511	4884	Illumina HiSeq 2000	postnatal 240 days		Guizhou mini-pigs	Eastern
PAIRED	SRR653846	SRS388208	Kidney	Kidney	2904	2148	Illumina HiSeq 2000			Tibetan	Eastern
PAIRED	SRR3160062	SRS1283292	Kidney	Kidney	5802	4109	Illumina HiSeq 2500	60 days old		Meishan	Eastern
PAIRED	SRR3160052	SRS1283302	Kidney	Kidney	4464	3151	Illumina HiSeq 2500	60 days old		Jinhua	Eastern
PAIRED	SRR3160042	SRS1283312	Kidney	Kidney	4009	2832	Illumina HiSeq 2500	60 days old		Bamei	Eastern
PAIRED	SRR3159992	SRS1283270	Kidney	Kidney	4559	3220	Illumina HiSeq 2500	60 days old		Berkshire	Western
PAIRED	SRR3160032	SRS1283322	Kidney	Kidney	3935	2782	Illumina HiSeq 2500	60 days old		Piétrain	Western
PAIRED	SRR3160022	SRS1283331	Kidney	Kidney	4612	3263	Illumina HiSeq 2500	60 days old		Large White	Western
PAIRED	SRR3160012	SRS1283341	Kidney	Kidney	3511	2483	Illumina HiSeq 2500	60 days old		Landrace	Western
PAIRED	SRR3160002	SRS1283352	Kidney	Kidney	5125	3681	Illumina HiSeq 2500	60 days old		Hampshire	Western
PAIRED	SRR653845	SRS388207	Lung	Lung	3362	2489	Illumina HiSeq 2000			Tibetan	Eastern
PAIRED	SRR3160061	SRS1283293	Lung	Lung	5083	3499	Illumina HiSeq 2500	60 days old		Meishan	Eastern
PAIRED	SRR3160051	SRS1283303	Lung	Lung	4568	3292	Illumina HiSeq 2500	60 days old		Jinhua	Eastern
PAIRED	SRR3160041	SRS1283313	Lung	Lung	5460	3935	Illumina HiSeq 2500	60 days old		Bamei	Eastern
PAIRED	SRR3159991	SRS1283271	Lung	Lung	4592	3311	Illumina HiSeq 2500	60 days old		Berkshire	Western
PAIRED	SRR3160031	SRS1283323	Lung	Lung	3902	2699	Illumina HiSeq 2500	60 days old		Piétrain	Western
PAIRED	SRR3160021	SRS1283332	Lung	Lung	4554	3281	Illumina HiSeq 2500	60 days old		Large White	Western
PAIRED	SRR3160011	SRS1283343	Lung	Lung	4931	3428	Illumina HiSeq 2500	60 days old		Landrace	Western
PAIRED	SRR3160001	SRS1283353	Lung	Lung	4702	3290	Illumina HiSeq 2500	60 days old		Hampshire	Western
PAIRED	SRR5136326	SRS1885624	Longissimus dorsi muscle	Muscle	4926	3441	Illumina HiSeq 2000			Tibetan pig	Eastern
PAIRED	SRR5136325	SRS1885623	Longissimus dorsi muscle	Muscle	5552	4020	Illumina HiSeq 2000			Diannan Small Ear pig	Eastern
PAIRED	SRR3160064	SRS1283290	Longissimus dorsi muscle	Muscle	5020	3479	Illumina HiSeq 2500	60 days old		Meishan	Eastern
PAIRED	SRR3160073	SRS1283281	Longissimus dorsi muscle	Muscle	6849	4468	Illumina HiSeq 2500	60 days old		Rongchang	Eastern
PAIRED	SRR3160078	SRS1283276	Longissimus dorsi muscle	Muscle	4597	3106	Illumina HiSeq 2500	60 days old		Tibetan wild boar	Eastern
PAIRED	SRR2564767	SRS1100818	Longissimus dorsi muscle	Muscle	6335	3584	Illumina HiSeq 2000	postnatal 0 days		Guizhou mini-pigs	Eastern
PAIRED	SRR2564768	SRS1100818	Longissimus dorsi muscle	Muscle	1028	755	Illumina HiSeq 2000	postnatal 0 days		Guizhou mini-pigs	Eastern
PAIRED	SRR2564769	SRS1100817	Longissimus dorsi muscle	Muscle	5550	3608	Illumina HiSeq 2000	postnatal 30 days		Guizhou mini-pigs	Eastern
PAIRED	SRR2564770	SRS1100817	Longissimus dorsi muscle	Muscle	1684	1202	Illumina HiSeq 2000	postnatal 30 days		Guizhou mini-pigs	Eastern
PAIRED	SRR2564771	SRS1100816	Longissimus dorsi muscle	Muscle	3591	2035	Illumina HiSeq 2000	postnatal 240 days		Guizhou mini-pigs	Eastern
PAIRED	SRR2564772	SRS1100816	Longissimus dorsi muscle	Muscle	3421	2506	Illumina HiSeq 2000	postnatal 240 days		Guizhou mini-pigs	Eastern
PAIRED	SRR2912674	SRS1158653	Longissimus dorsi muscle	Muscle	4722	3112	Illumina Genome Analyzer II	Fetal	pooled male and female	Tongcheng pig	Eastern
PAIRED	SRR2919657	SRS1164594	Longissimus dorsi muscle	Muscle	6159	4083	Illumina HiSeq 2500	5 months old		Wannanhua	Eastern
PAIRED	SRR2919658	SRS1164593	Longissimus dorsi muscle	Muscle	6134	4064	Illumina HiSeq 2500	5 months old		Wannanhua	Eastern
PAIRED	SRR2919659	SRS1164592	Longissimus dorsi muscle	Muscle	5649	3766	Illumina HiSeq 2500	5 months old		Wannanhua	Eastern
SINGLE	SRR2924898	SRS1168875	Longissimus dorsi muscle	Muscle	6729	4245	Illumina HiSeq 2000	post coitum day 40	not collected	Tongcheng	Eastern
SINGLE	SRR2924906	SRS1168881	Longissimus dorsi muscle	Muscle	6383	4517	Illumina HiSeq 2000	post coitum day 55	female	Tongcheng	Eastern
SINGLE	SRR2924924	SRS1168891	Longissimus dorsi muscle	Muscle	6849	4854	Illumina HiSeq 2000	post coitum day 63	female	Tongcheng	Eastern
SINGLE	SRR2924926	SRS1168895	Longissimus dorsi muscle	Muscle	6572	4692	Illumina HiSeq 2000	post coitum day 70	female	Tongcheng	Eastern
SINGLE	SRR2924928	SRS1168898	Longissimus dorsi muscle	Muscle	6798	4813	Illumina HiSeq 2000	post coitum day 90	female	Tongcheng	Eastern
PAIRED	SRR3160054	SRS1283300	Longissimus dorsi muscle	Muscle	7084	4945	Illumina HiSeq 2500	60 days old		Jinhua	Eastern
PAIRED	SRR3160044	SRS1283310	Longissimus dorsi muscle	Muscle	5472	3810	Illumina HiSeq 2500	60 days old		Bamei	Eastern
PAIRED	SRR5043818	SRS1812969	Muscle	Muscle	5145	2506	Illumina HiSeq 2500	400 days old		Laiwu	Eastern
PAIRED	SRR5043819	SRS1812969	Muscle	Muscle	4360	2165	Illumina HiSeq 2500	400 days old		Laiwu	Eastern
PAIRED	SRR5043820	SRS1812969	Muscle	Muscle	4362	2128	Illumina HiSeq 2500	400 days old		Laiwu	Eastern
PAIRED	SRR5043821	SRS1812970	Muscle	Muscle	4012	1980	Illumina HiSeq 2500	240 days old		Laiwu	Eastern
PAIRED	SRR5043822	SRS1812970	Muscle	Muscle	4133	2087	Illumina HiSeq 2500	240 days old		Laiwu	Eastern
PAIRED	SRR5043823	SRS1812970	Muscle	Muscle	4191	2037	Illumina HiSeq 2500	240 days old		Laiwu	Eastern
PAIRED	SRR5043824	SRS1812971	Muscle	Muscle	4028	1533	Illumina HiSeq 2500	60 days old		Laiwu	Eastern
PAIRED	SRR5043825	SRS1812971	Muscle	Muscle	4712	1792	Illumina HiSeq 2500	60 days old		Laiwu	Eastern
PAIRED	SRR5043826	SRS1812971	Muscle	Muscle	4378	1643	Illumina HiSeq 2500	60 days old		Laiwu	Eastern
PAIRED	SRR5043827	SRS1812972	Muscle	Muscle	4164	1578	Illumina HiSeq 2500	120 days old		Laiwu	Eastern
PAIRED	SRR5043828	SRS1812972	Muscle	Muscle	4177	1706	Illumina HiSeq 2500	120 days old		Laiwu	Eastern
PAIRED	SRR5043829	SRS1812972	Muscle	Muscle	4014	1591	Illumina HiSeq 2500	120 days old		Laiwu	Eastern
PAIRED	SRR2919660	SRS1164591	Longissimus dorsi muscle	Muscle	5528	3671	Illumina HiSeq 2500	5 months old		Yorkshire	Western
PAIRED	SRR2919661	SRS1164590	Longissimus dorsi muscle	Muscle	6509	4342	Illumina HiSeq 2500	5 months old		Yorkshire	Western
PAIRED	SRR2919662	SRS1164589	Longissimus dorsi muscle	Muscle	6894	4597	Illumina HiSeq 2500	5 months old		Yorkshire	Western
SINGLE	SRR2952735	SRS1172553	Longissimus dorsi muscle	Muscle	6507	4509	Illumina HiSeq 2000	post coitum day 40	not collected	Yorkshire	Western
SINGLE	SRR2952736	SRS1172579	Longissimus dorsi muscle	Muscle	6586	4264	Illumina HiSeq 2000	post coitum day 55	female	Yorkshire	Western
SINGLE	SRR2952751	SRS1172580	Longissimus dorsi muscle	Muscle	6540	4502	Illumina HiSeq 2000	post coitum day 63	female	Yorkshire	Western
SINGLE	SRR2952753	SRS1172581	Longissimus dorsi muscle	Muscle	6639	4383	Illumina HiSeq 2000	post coitum day 70	female	Yorkshire	Western
SINGLE	SRR2952765	SRS1172582	Longissimus dorsi muscle	Muscle	6729	4652	Illumina HiSeq 2000	post coitum day 90	female	Yorkshire	Western
PAIRED	SRR3159994	SRS1283268	Longissimus dorsi muscle	Muscle	5852	3865	Illumina HiSeq 2500	60 days old		Berkshire	Western
PAIRED	SRR3160034	SRS1283320	Longissimus dorsi muscle	Muscle	5003	3464	Illumina HiSeq 2500	60 days old		Piétrain	Western
PAIRED	SRR3160024	SRS1283329	Longissimus dorsi muscle	Muscle	5179	3325	Illumina HiSeq 2500	60 days old		Large White	Western
PAIRED	SRR3160014	SRS1283339	Longissimus dorsi muscle	Muscle	5586	3520	Illumina HiSeq 2500	60 days old		Landrace	Western
PAIRED	SRR3160004	SRS1283350	Longissimus dorsi muscle	Muscle	5253	3605	Illumina HiSeq 2500	60 days old		Hampshire	Western
PAIRED	SRR5091884	SRS1847117	Skeletal muscle	Muscle	5081	2351	Illumina HiSeq 2500	2 days postpartum	male	Yorkshire	Western
PAIRED	SRR5091885	SRS1847118	Skeletal muscle	Muscle	5627	2535	Illumina HiSeq 2500	2 days postpartum	male	Yorkshire	Western
PAIRED	SRR5091886	SRS1847119	Skeletal muscle	Muscle	4915	2245	Illumina HiSeq 2500	2 days postpartum	male	Yorkshire	Western
PAIRED	SRR5091887	SRS1847120	Skeletal muscle	Muscle	4756	2165	Illumina HiSeq 2500	2 days postpartum	male	Yorkshire	Western
PAIRED	SRR5091888	SRS1847121	Skeletal muscle	Muscle	6984	3074	Illumina HiSeq 2500	2 days postpartum	male	Yorkshire	Western
PAIRED	SRR5091889	SRS1847122	Skeletal muscle	Muscle	5511	2462	Illumina HiSeq 2500	2 days postpartum	male	Yorkshire	Western
PAIRED	SRR5136328	SRS1885626	Longissimus dorsi muscle	Muscle	5873	4122	Illumina HiSeq 2000			Yorkshire	Western
PAIRED	SRR5136327	SRS1885625	Longissimus dorsi muscle	Muscle	5188	3744	Illumina HiSeq 2000			Landrace	Western
PAIRED	SRR2564763	SRS1100806	Ovary	Ovary	2225	1358	Illumina HiSeq 2000	postnatal 240 days		Guizhou mini-pigs	Eastern
PAIRED	SRR2564764	SRS1100806	Ovary	Ovary	1436	838	Illumina HiSeq 2000	postnatal 240 days		Guizhou mini-pigs	Eastern
PAIRED	SRR2564765	SRS1100806	Ovary	Ovary	4819	3024	Illumina HiSeq 2000	postnatal 240 days		Guizhou mini-pigs	Eastern
PAIRED	SRR3160075	SRS1283279	Ovary	Ovary	3711	2654	Illumina HiSeq 2500	60 days old		Rongchang	Eastern
PAIRED	SRR3160066	SRS1283288	Ovary	Ovary	4768	3403	Illumina HiSeq 2500	60 days old		Meishan	Eastern
PAIRED	SRR3160056	SRS1283298	Ovary	Ovary	4620	3302	Illumina HiSeq 2500	60 days old		Jinhua	Eastern
PAIRED	SRR3160046	SRS1283308	Ovary	Ovary	4036	2880	Illumina HiSeq 2500	60 days old		Bamei	Eastern
PAIRED	SRR3178395	SRS1300665	Ovary	Ovary	41036	20102	Illumina HiSeq 2000	day 13 of estrous cycle	female	Chinese Erhualian pig	Eastern
SINGLE	SRR2016644	SRS938319	Ovary	Ovary	6465	3378	Illumina HiSeq 2000	4 birth parities	female	Yorkshire	Western
SINGLE	SRR2029398	SRS938337	Ovary	Ovary	7341	3819	Illumina HiSeq 2000	7 birth parities	female	Yorkshire	Western
SINGLE	SRR2029399	SRS938338	Ovary	Ovary	7900	3882	Illumina HiSeq 2000	7 birth parities	female	Yorkshire	Western
SINGLE	SRR2029575	SRS938436	Ovary	Ovary	8056	4212	Illumina HiSeq 2000	4 birth parities	female	Yorkshire	Western
SINGLE	SRR2029576	SRS938437	Ovary	Ovary	7107	3687	Illumina HiSeq 2000	4 birth parities	female	Yorkshire	Western
SINGLE	SRR2029577	SRS938438	Ovary	Ovary	7927	3916	Illumina HiSeq 2000	4 birth parities	female	Yorkshire	Western
PAIRED	SRR3159996	SRS1283266	Ovary	Ovary	4251	3045	Illumina HiSeq 2500	60 days old		Berkshire	Western
PAIRED	SRR3160036	SRS1283318	Ovary	Ovary	4347	3114	Illumina HiSeq 2500	60 days old		Piétrain	Western
PAIRED	SRR3160016	SRS1283337	Ovary	Ovary	5817	4211	Illumina HiSeq 2500	60 days old		Landrace	Western
PAIRED	SRR3160006	SRS1283348	Ovary	Ovary	3786	2704	Illumina HiSeq 2500	60 days old		Hampshire	Western
PAIRED	SRR6236876	SRS2760027	Ovary	Ovary	8874	3358	Illumina HiSeq 2000	8 months	female	Yorkshire	Western
PAIRED	SRR6236879	SRS2760028	Ovary	Ovary	7519	2945	Illumina HiSeq 2000	8 months	female	Yorkshire	Western
PAIRED	SRR6236881	SRS2760029	Ovary	Ovary	7485	2948	Illumina HiSeq 2000	8 months	female	Yorkshire	Western
PAIRED	SRR6236882	SRS2760030	Ovary	Ovary	6211	3290	Illumina HiSeq 2000	8 months	female	Yorkshire	Western
PAIRED	SRR6236888	SRS2760031	Ovary	Ovary	7116	3755	Illumina HiSeq 2000	8 months	female	Yorkshire	Western
PAIRED	SRR6236889	SRS2760032	Ovary	Ovary	7689	4071	Illumina HiSeq 2000	8 months	female	Yorkshire	Western
PAIRED	SRR2564759	SRS1100811	Spleen	Spleen	7441	4350	Illumina HiSeq 2000	postnatal 240 days		Guizhou mini-pigs	Eastern
PAIRED	SRR3160077	SRS1283277	Spleen	Spleen	4260	2969	Illumina HiSeq 2500	60 days old		Tibetan wild boar	Eastern
PAIRED	SRR3160070	SRS1283284	Spleen	Spleen	4337	3120	Illumina HiSeq 2500	60 days old		Rongchang	Eastern
PAIRED	SRR3160060	SRS1283294	Spleen	Spleen	5253	3914	Illumina HiSeq 2500	60 days old		Meishan	Eastern
PAIRED	SRR3160050	SRS1283304	Spleen	Spleen	4286	2981	Illumina HiSeq 2500	60 days old		Jinhua	Eastern
PAIRED	SRR3160040	SRS1283314	Spleen	Spleen	3966	2827	Illumina HiSeq 2500	60 days old		Bamei	Eastern
PAIRED	SRR3354390	SRS1383571	Spleen	Spleen	6874	4422	Illumina HiSeq 2000	3 month	pooled male and female	Tibetan pig	Eastern
PAIRED	SRR6240076	SRS2647321	Spleen	Spleen	11472	4620	HiSeq X Ten	55 days before birth		Rongchang	Eastern
PAIRED	SRR6240077	SRS2647322	Spleen	Spleen	11833	4821	HiSeq X Ten	55 days before birth		Rongchang	Eastern
PAIRED	SRR6240078	SRS2647323	Spleen	Spleen	9734	3958	HiSeq X Ten	55 days before birth		Rongchang	Eastern
PAIRED	SRR6240080	SRS2647324	Spleen	Spleen	11573	4873	HiSeq X Ten	just after birth		Rongchang	Eastern
PAIRED	SRR6240079	SRS2647325	Spleen	Spleen	11637	4805	HiSeq X Ten	just after birth		Rongchang	Eastern
PAIRED	SRR6240081	SRS2647326	Spleen	Spleen	12138	5102	HiSeq X Ten	just after birth		Rongchang	Eastern
PAIRED	SRR6240082	SRS2647327	Spleen	Spleen	12940	5450	HiSeq X Ten	weaned for 30 days		Rongchang	Eastern
PAIRED	SRR6240083	SRS2647328	Spleen	Spleen	9843	4139	HiSeq X Ten	weaned for 30 days		Rongchang	Eastern
PAIRED	SRR6240084	SRS2647329	Spleen	Spleen	11719	4880	HiSeq X Ten	weaned for 30 days		Rongchang	Eastern
PAIRED	SRR6240085	SRS2647330	Spleen	Spleen	10670	4315	HiSeq X Ten	180 days old		Rongchang	Eastern
PAIRED	SRR6240086	SRS2647331	Spleen	Spleen	10321	4156	HiSeq X Ten	180 days old		Rongchang	Eastern
PAIRED	SRR6240087	SRS2647332	Spleen	Spleen	9600	3952	HiSeq X Ten	180 days old		Rongchang	Eastern
PAIRED	SRR6240088	SRS2647333	Spleen	Spleen	15941	6799	HiSeq X Ten	2 years old		Rongchang	Eastern
PAIRED	SRR6240089	SRS2647334	Spleen	Spleen	19804	8231	HiSeq X Ten	2 years old		Rongchang	Eastern
PAIRED	SRR6240090	SRS2647335	Spleen	Spleen	13468	5682	HiSeq X Ten	2 years old		Rongchang	Eastern
PAIRED	SRR6240091	SRS2647336	Spleen	Spleen	9958	4107	HiSeq X Ten	2 years old		Rongchang	Eastern
PAIRED	SRR6240092	SRS2647337	Spleen	Spleen	9636	3936	HiSeq X Ten	2 years old		Rongchang	Eastern
PAIRED	SRR6240093	SRS2647338	Spleen	Spleen	9590	3964	HiSeq X Ten	2 years old		Rongchang	Eastern
PAIRED	SRR3159990	SRS1283272	Spleen	Spleen	4885	3414	Illumina HiSeq 2500	60 days old		Berkshire	Western
PAIRED	SRR3160030	SRS1283324	Spleen	Spleen	4490	3121	Illumina HiSeq 2500	60 days old		Piétrain	Western
PAIRED	SRR3160020	SRS1283333	Spleen	Spleen	4853	3461	Illumina HiSeq 2500	60 days old		Large White	Western
PAIRED	SRR3160010	SRS1283344	Spleen	Spleen	4524	3235	Illumina HiSeq 2500	60 days old		Landrace	Western
PAIRED	SRR3160000	SRS1283354	Spleen	Spleen	4700	3281	Illumina HiSeq 2500	60 days old		Hampshire	Western
